# Supplementary material for: Study on the preparation of ascorbic acid reduced ultrafine copper powders in the presence of different protectants and the properties of copper powders based on methionine protection
Source: Royal Society of Chemistry journal article supplement (doi:10.1039/d3na01146a), 2024-01-01
Supplement: d3na01146a1.pdf [file d3na01146a1.pdf]

## Supporting Information

Study on the preparation of ascorbic acid reduced ultrafine copper powders in the presence of different protectants and the properties of copper powders based on methionine protection

*Xin Ke, <sup>a,b,c</sup> Bingqing Xie, <sup>a,b,c</sup> Jingguo Zhang, \*<sup>a,b,d</sup> Jianwei Wang, \*<sup>a,e</sup> Weiying Li, <sup>b</sup>*

*Liqing Ban, <sup>a,b</sup> Qiang Hu, <sup>a,b</sup> Huijun He, <sup>a,b</sup> Limin Wang, <sup>a,b</sup> Zhong Wang\*<sup>a,b</sup>*

*<sup>a</sup>Metal Powder Materials Industrial Technology Research Institute of CHINA*

*GRINM, Beijing 101407, China*

*<sup>b</sup>GRIPM Advanced Materials Co. Ltd., Beijing 101407,*

*<sup>c</sup>General Research Institute for Nonferrous Metals, Beijing 100088, China*

*<sup>d</sup>China Gricy Advanced Materials Co., Ltd., Chongqing 401431, China*

*<sup>e</sup>GRINM NEXUSX Advanced Materials (Beijing) Co. Ltd., Beijing 101407, China*

Zhong Wang, \*Corresponding author: wz99@126.com.

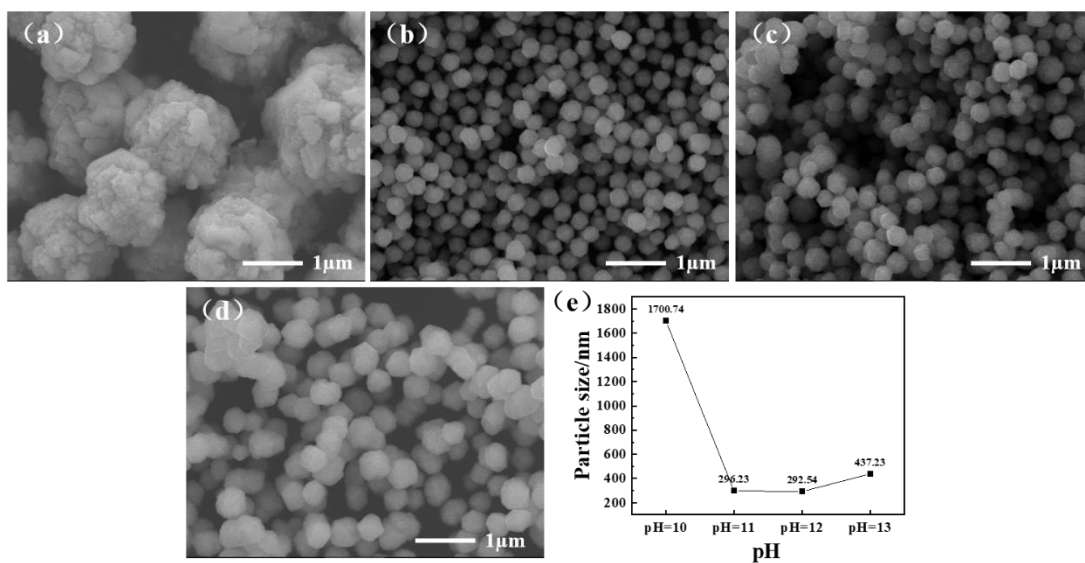

Fig. S1. SEM images and particle size variation of copper powder particles under different pH conditions using Met as a protectant; (a)pH=10; (b) pH=11; (c)pH=12; (d) pH=13; (e) copper powder particles size variation.

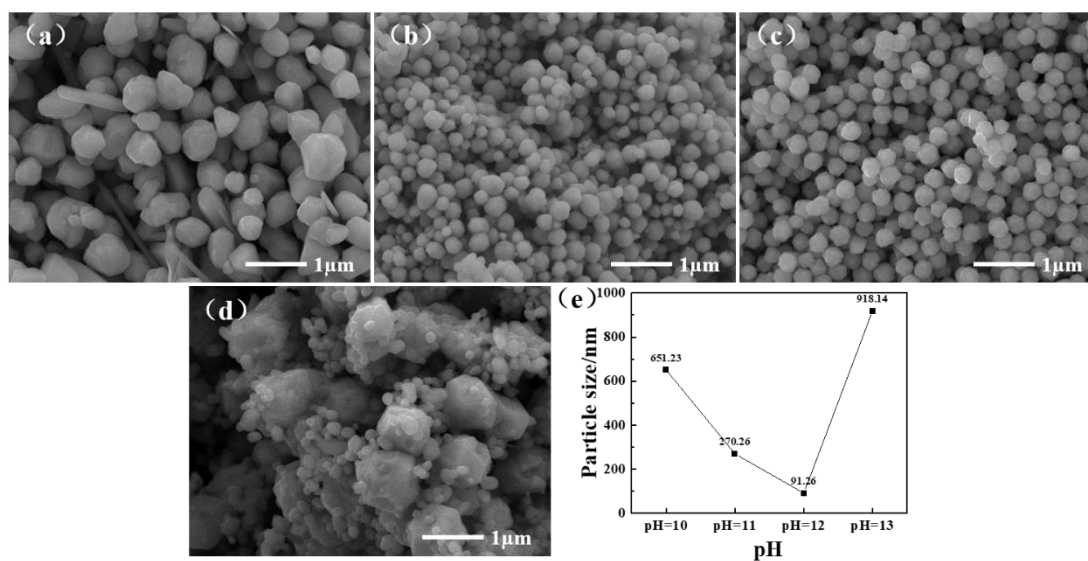

Fig. S2. SEM images and particle size variation of copper powder particles under different pH conditions using CTAB as a protectant; (a)pH=10; (b) pH=11; (c)pH=12; (d) pH=13; (e) copper powder particles size variation.

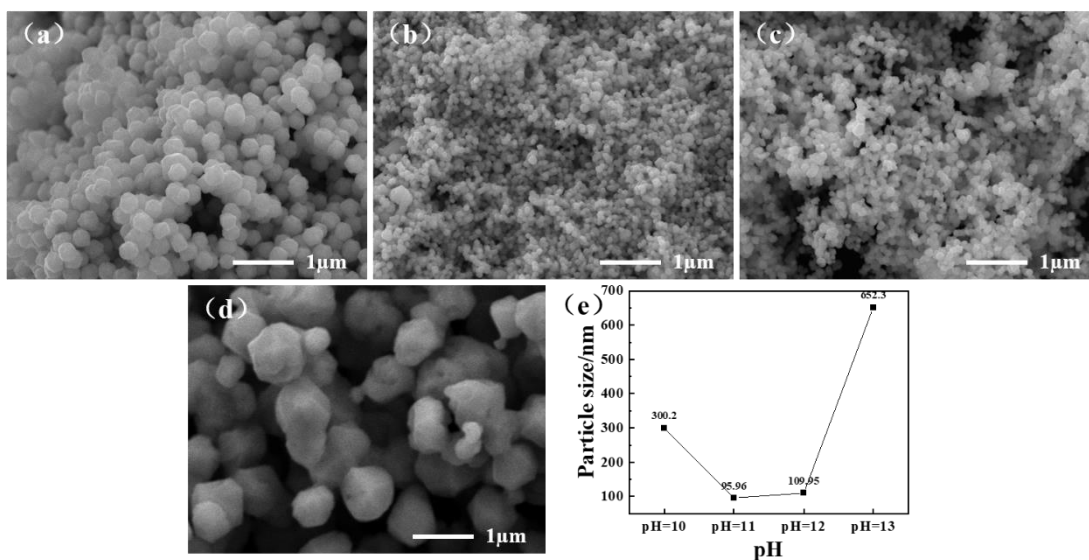

Fig. S3. SEM images and particle size variation of copper powder particles under different pH conditions using SSC as a protectant; (a) pH=10; (b) pH=11; (c) pH=12; (d) pH=13; (e) copper powder particles size variation.

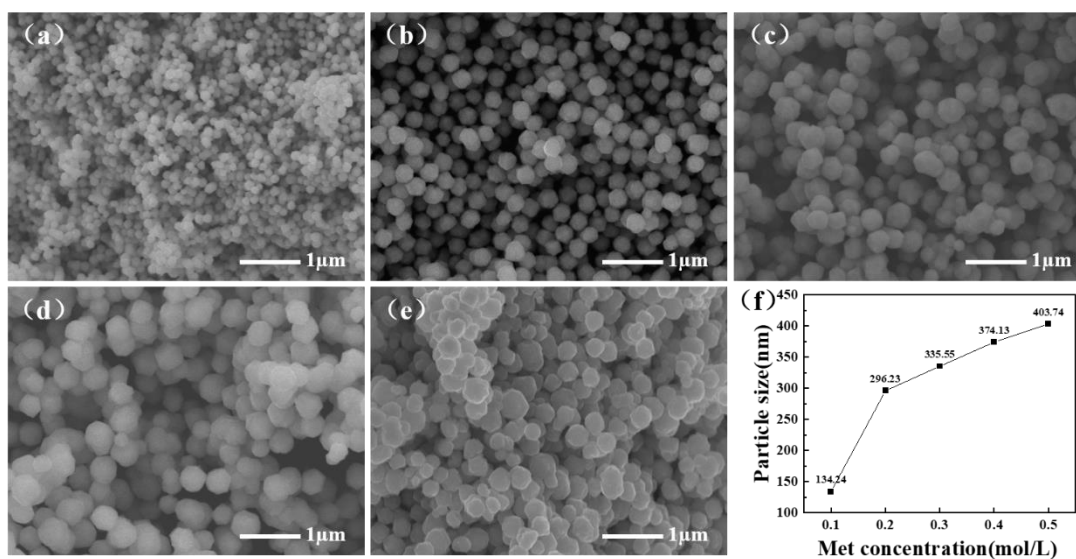

Fig. S4. SEM images and particle size variation of copper powder particles at different Met concentrations using Met as a protectant; (a) Met=0.1 mol/L; (b) Met=0.2 mol/L; (c) Met=0.3 mol/L; (d) Met=0.4 mol/L; (e) Met=0.5 mol/L; (f) copper powder particles size variation.

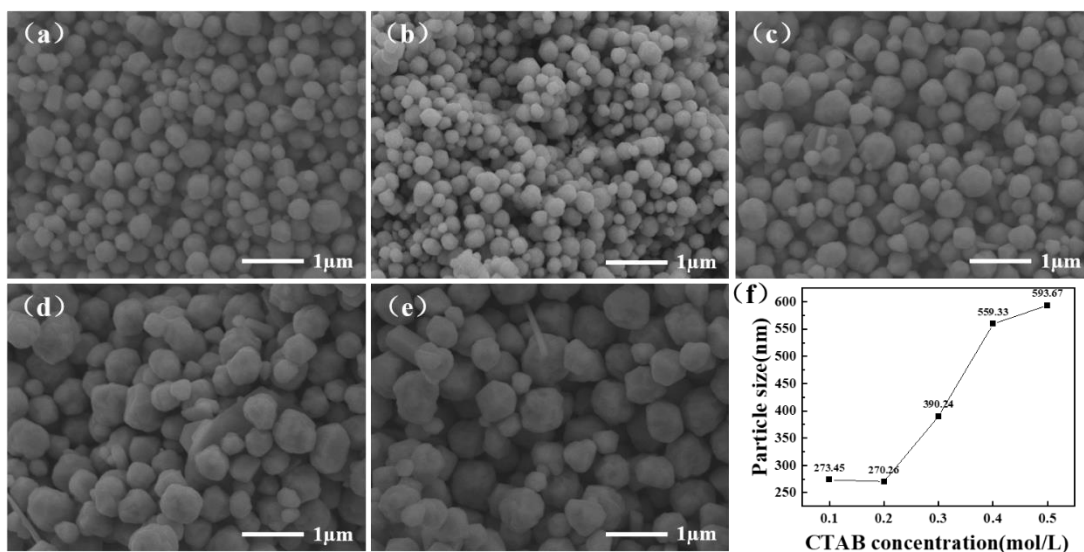

Fig. S5. SEM images and particle size variation of copper powder particles at different Met concentrations using CTAB as a protectant; (a)CTAB=0.1 mol/L; (b) CTAB=0.2 mol/L; (c) CTAB=0.3 mol/L; (d) CTAB=0.4 mol/L; (e) CTAB=0.5 mol/L; (f) copper powder particles size variation.

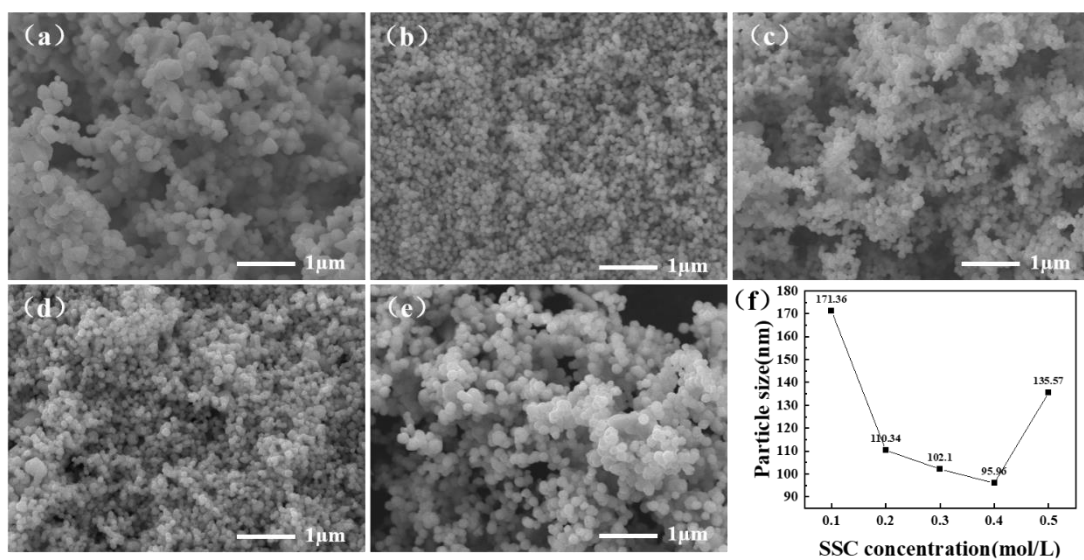

Fig. S6. SEM images and particle size variation of copper powder particles at different Met concentrations using SSC as a protectant; (a)SSC=0.1 mol/L; (b) SSC=0.2 mol/L; (c) SSC=0.3 mol/L; (d) SSC=0.4 mol/L; (e) SSC=0.5 mol/L; (f) copper powder particles size variation.

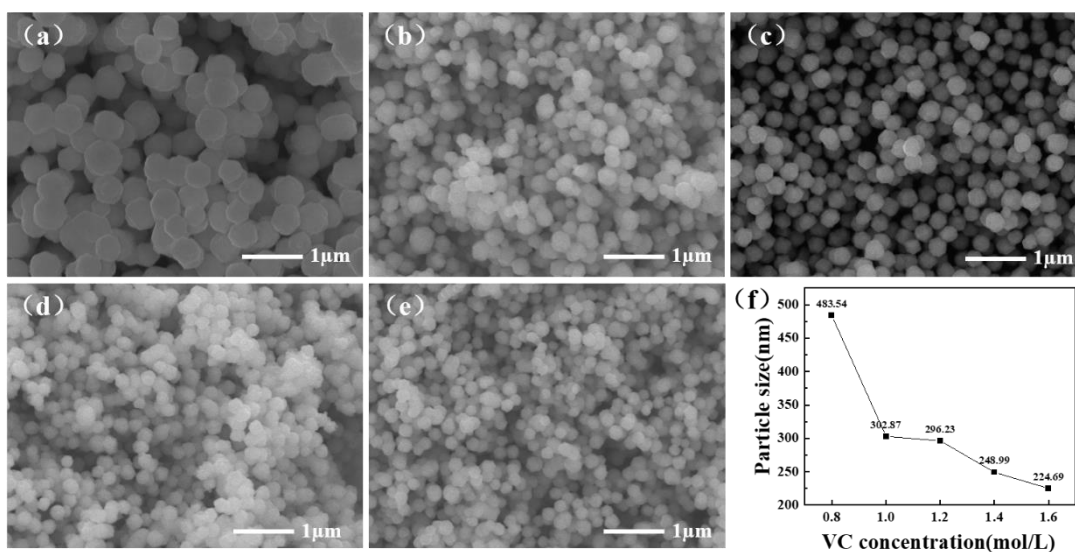

Fig. S7. SEM images and particle size variation of copper powder particles at different  $C_6H_8O_6$  concentrations using Met as a protective agent; (a)  $C_6H_8O_6=0.8$  mol/L; (b)  $C_6H_8O_6=1.0$  mol/L; (c)  $C_6H_8O_6=1.2$  mol/L; (d)  $C_6H_8O_6=1.4$  mol/L; (e)  $C_6H_8O_6=1.6$  mol/L; (f) copper powder particles size variation.

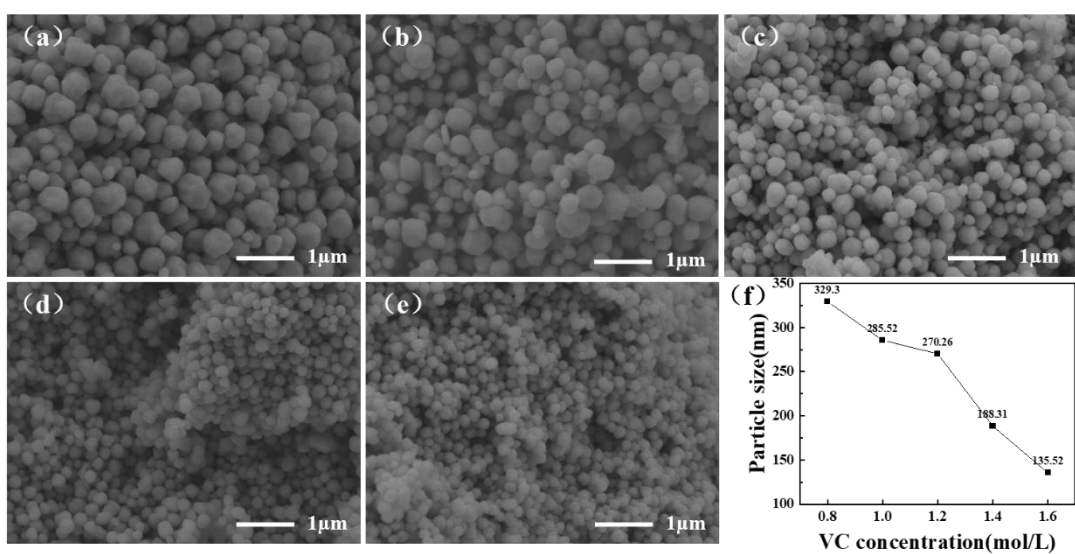

Fig. S8. SEM images and particle size variation of copper powder particles at different  $C_6H_8O_6$  concentrations using CTAB as a protective agent; (a)  $C_6H_8O_6=0.8$  mol/L; (b)  $C_6H_8O_6=1.0$  mol/L; (c)  $C_6H_8O_6=1.2$  mol/L; (d)  $C_6H_8O_6=1.4$  mol/L; (e)  $C_6H_8O_6=1.6$  mol/L; (f) copper powder particles size variation.

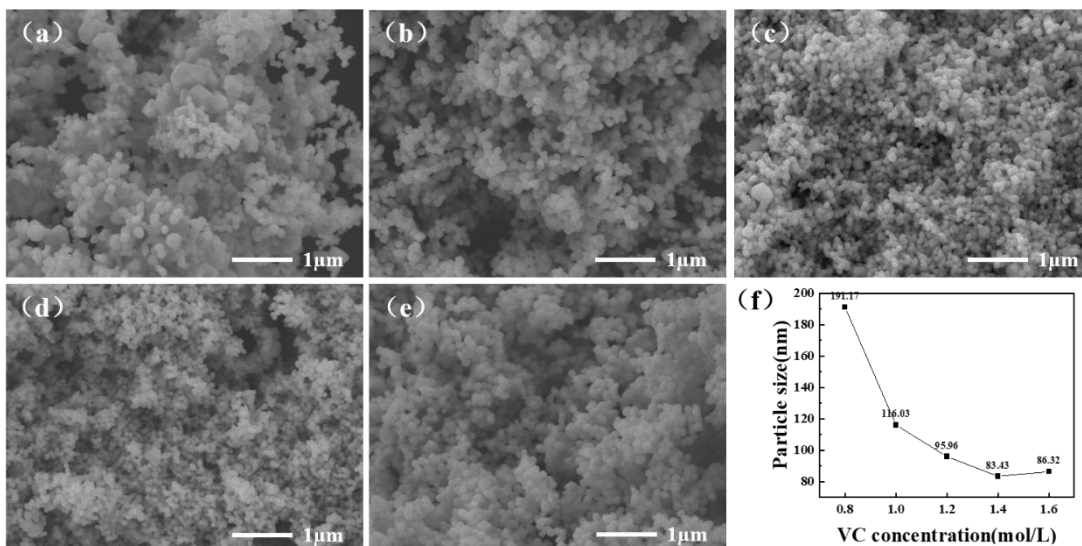

Fig. S9. SEM images and particle size variation of copper powder particles at different  $C_6H_8O_6$  concentrations using SSC as a protective agent; (a)  $C_6H_8O_6=0.8$  mol/L; (b)  $C_6H_8O_6=1.0$  mol/L; (c)  $C_6H_8O_6=1.2$  mol/L; (d)  $C_6H_8O_6=1.4$  mol/L; (e)  $C_6H_8O_6=1.6$  mol/L; (f) copper powder particles size variation.

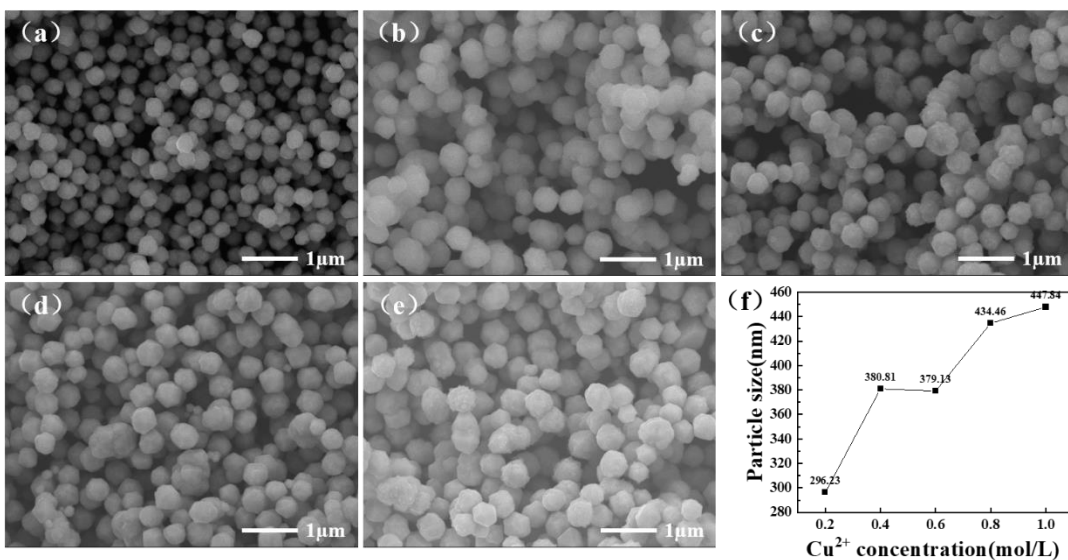

Fig. S10. SEM images and particle size variation of copper powder particles with different  $Cu^{2+}$  concentrations using Met as a protectant; (a)  $Cu^{2+}=0.2$  mol/L; (b)  $Cu^{2+}=0.4$  mol/L; (c)  $Cu^{2+}=0.6$  mol/L; (d)  $Cu^{2+}=0.8$  mol/L; (e)  $Cu^{2+}=1.0$  mol/L; (f) copper powder particles size variation.

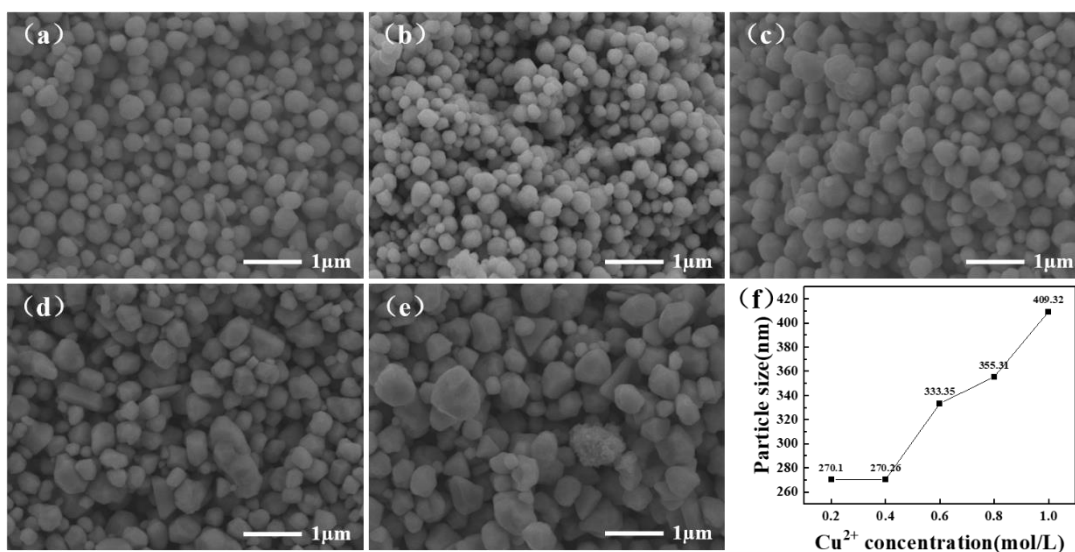

Fig. S11. SEM images and particle size variation of copper powder particles with different  $\text{Cu}^{2+}$  concentrations using CTAB as a protectant; (a)  $\text{Cu}^{2+}=0.2$  mol/L; (b)  $\text{Cu}^{2+}=0.4$  mol/L; (c)  $\text{Cu}^{2+}=0.6$  mol/L; (d)  $\text{Cu}^{2+}=0.8$  mol/L; (e)  $\text{Cu}^{2+}=1.0$  mol/L; (f) copper powder particles size variation.

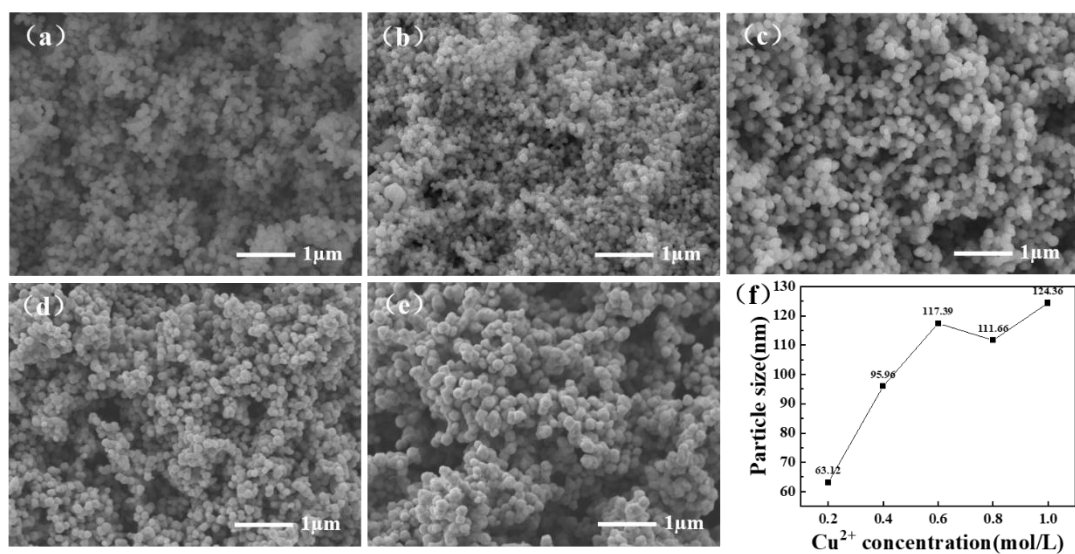

Fig. S12. SEM images and particle size variation of copper powder particles with different  $\text{Cu}^{2+}$  concentrations using SSC as a protectant; (a)  $\text{Cu}^{2+}=0.2$  mol/L; (b)  $\text{Cu}^{2+}=0.4$  mol/L; (c)  $\text{Cu}^{2+}=0.6$  mol/L; (d)  $\text{Cu}^{2+}=0.8$  mol/L; (e)  $\text{Cu}^{2+}=1.0$  mol/L; (f) copper powder particles size variation.

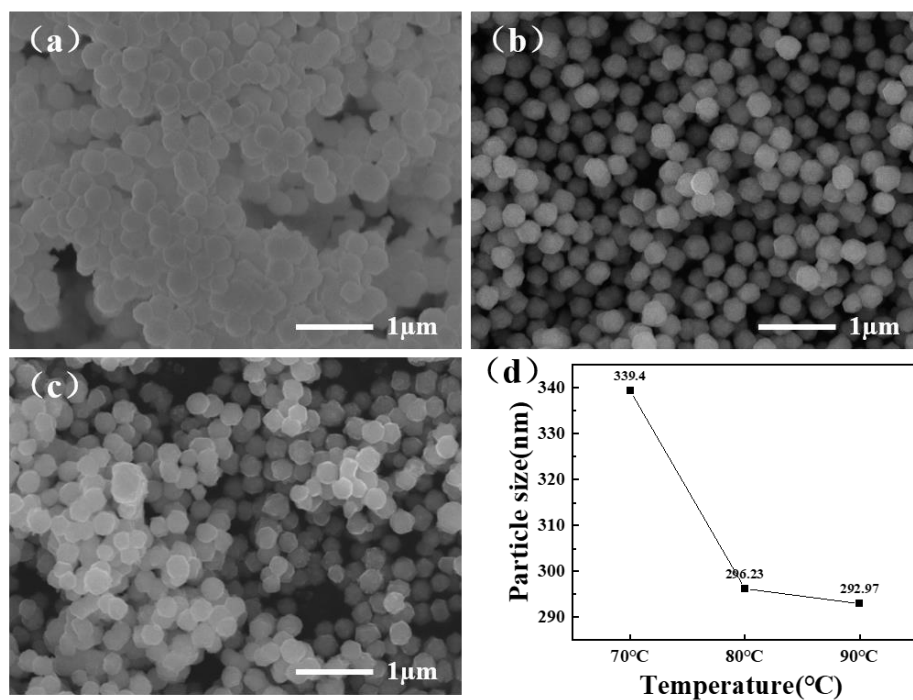

Fig. S13. SEM images and particle size variation of copper powder particles at different temperatures using Met as a protectant; (a) T=70°C; (b) T=80°C; (c) T=90°C; (d) copper powder particles size variation.

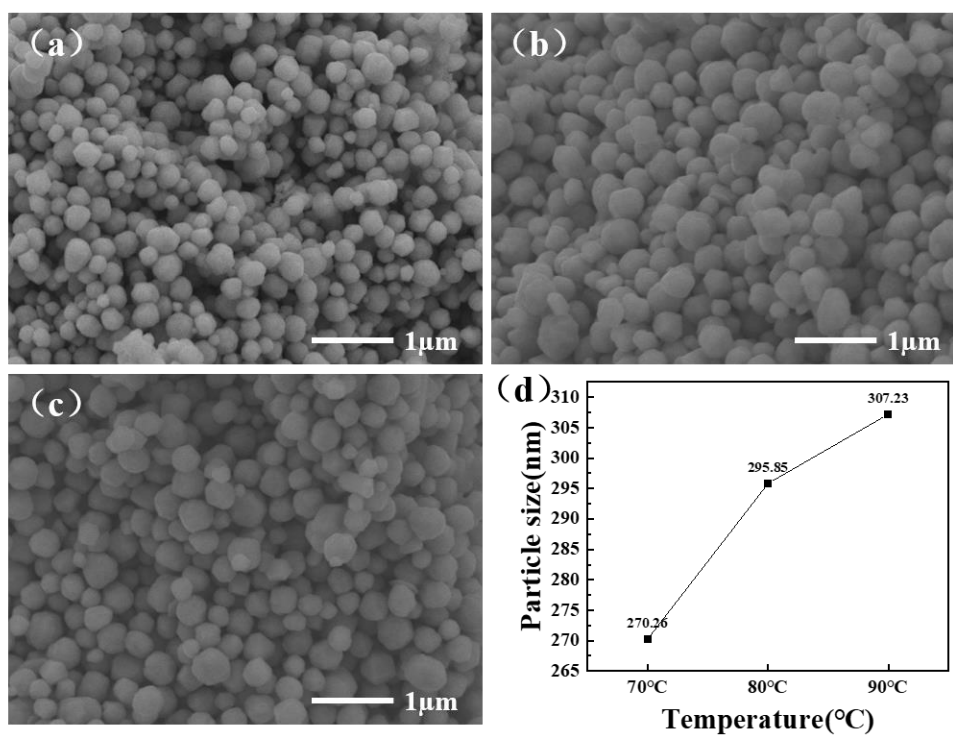

Fig. S14. SEM images and particle size variation of copper powder particles at different temperatures using CTAB as a protectant; (a) T=70°C; (b) T=80°C; (c) T=90°C; (d) copper powder particles size variation.



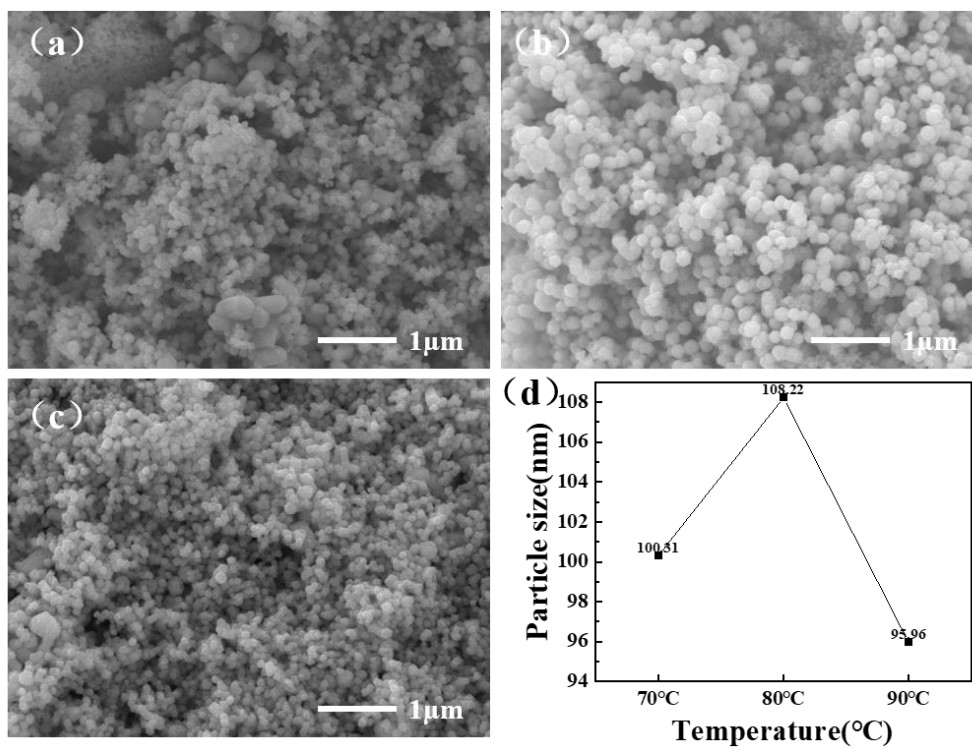

Fig. S15. SEM images and particle size variation of copper powder particles at different temperatures using SSC as a protectant; (a) T=70°C; (b) T=80°C; (c) T=90°C; (d) copper powder particles size variation.

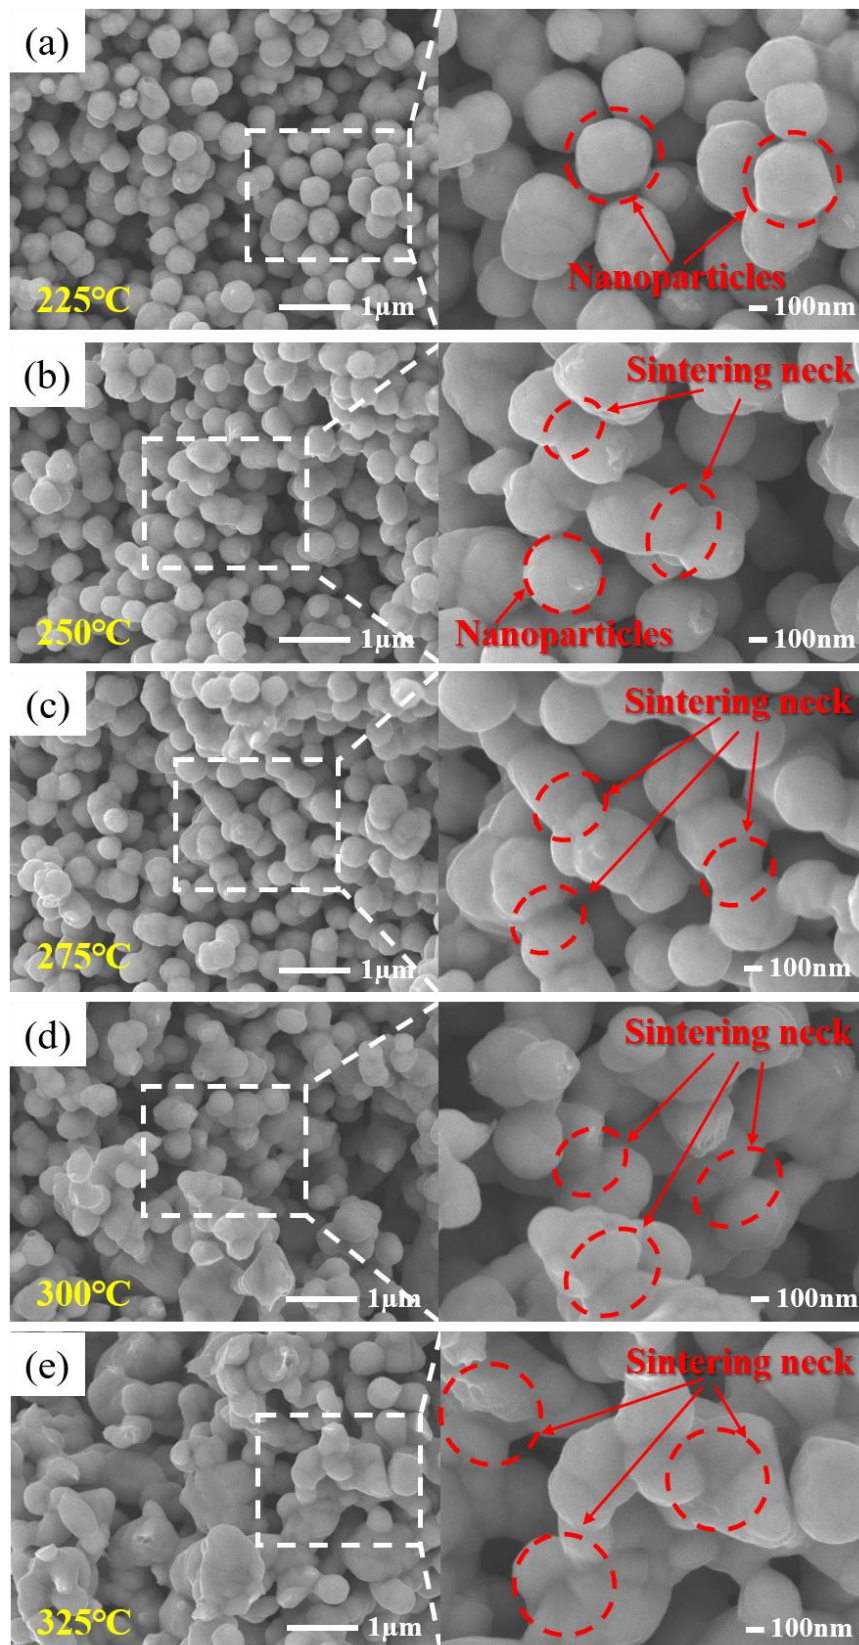

Fig. S16. SEM cross-sectional micrographs of copper nanoflakes held at different sintering temperatures for 30 min: (a) 225°C; (b) 250°C; (c) 275°C; (d) 300°C; (e) 325°C.
